# Supplementary material for: STING agonist-based treatment promotes vascular normalization and tertiary lymphoid structure formation in the therapeutic melanoma microenvironment
Source: PubMed Central journal article supplement — J Immunother Cancer. 2021 Feb 1;9(2):e001906. doi: 10.1136/jitc-2020-001906 (PMC7852948; doi:10.1136/jitc-2020-001906), 2021-02-01
Supplement: jitc-2020-001906supp001.pdf [file jitc-2020-001906supp001.pdf]

# STING Agonist-Based Treatment Promotes Vascular Normalization and Tertiary Lymphoid Structure Formation in the Therapeutic Melanoma Microenvironment

## **Supplementary Figures**

Manoj Chelvanambi<sup>1</sup>, Ronald J. Fecek<sup>2</sup>, Jennifer L. Taylor<sup>2</sup>, Walter J. Storkus<sup>1-5\*</sup>

<sup>1</sup> Department of Immunology, University of Pittsburgh School of Medicine (UPSOM), Pittsburgh PA 15213

<sup>2</sup> Department of Dermatology (UPSOM), Pittsburgh PA 15213

<sup>3</sup> Department of Pathology (UPSOM), Pittsburgh PA 15213

<sup>4</sup> Department of Bioengineering (UPSOM), Pittsburgh PA 15213

<sup>5</sup> University of Pittsburgh Cancer Institute, Pittsburgh PA 15213

Fig. S1:

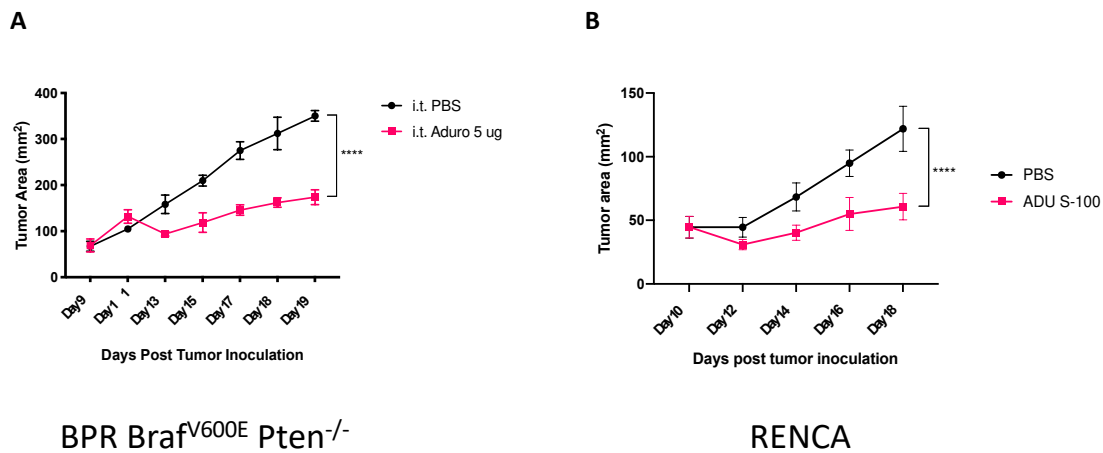

**Figure S1: STING agonist ADU S-100 slows growth of BPR Melanoma and RENCA renal cell carcinomas in syngeneic immunocompetent hosts.** Representative tumor growth curves from treated cohorts (n = 5/group) of C57BL/6 mice bearing established BPR melanomas (**A**) or BALB/c mice bearing established RENCA renal cell carcinomas (**B**) as described in **Fig. 1** and Materials and Methods. Note significantly slower tumor growth kinetics when mice were treated with STING agonist ADU S-100 intratumorally. Tumors were measured using calipers and sizes are represented as total tumor area (calculated as small axis x large axis). \*\*\*\*p < 0.0001, Two-Way ANOVA. Representative tumor growth curves from three independent experiments.

Fig. S2:

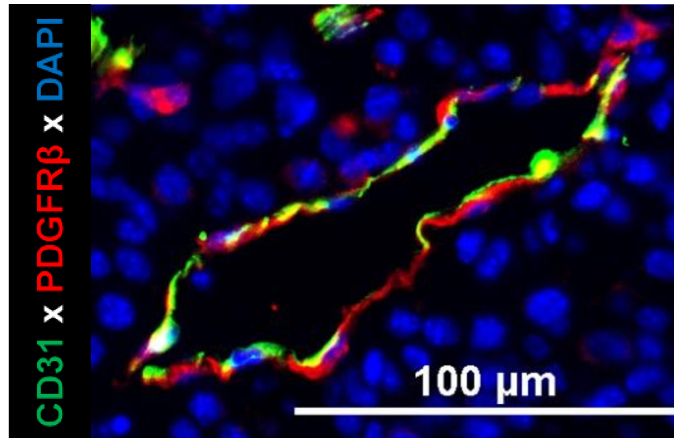

**Figure S2: Representative high-magnification immunofluorescence image demonstrating separate spatial stacking of PDGFR $\beta$ <sup>+</sup> pericytes and CD31<sup>+</sup> VEC in normalized blood vessels found in B16 melanomas treated with i.t. ADU S-100 (as described in Fig. 2). Note yellow (overlap of red/green signals) pseudo-coloring of the abluminal VEC cell surfaces with tightly approximated pericyte cell surfaces. Scale bar = 100 $\mu$ m**

Fig. S3:

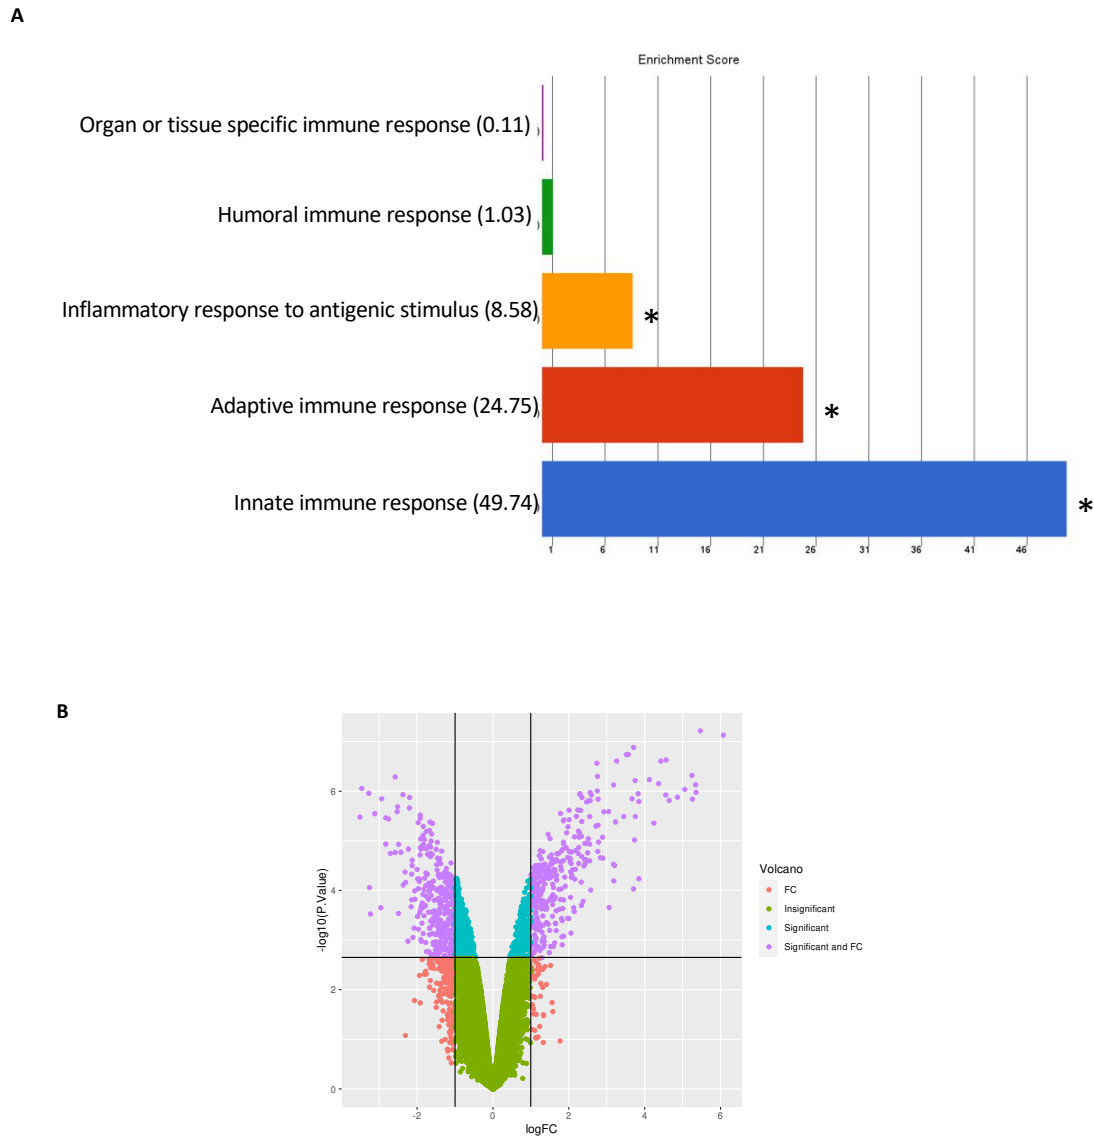

**Figure S3: Transcriptional profiling and pathway analysis of CD11c<sup>+</sup> DC treated with ADU S-100 vs control media. A.** Biological processes associated with top GO term, immune response (GO:0006955), enriched in ADU S-100-treated CD11c<sup>+</sup> DCs. \*p-value < 0.05, One-way ANOVA. **B.** Volcano plot of CD11c<sup>+</sup> DC genes analyzed via microarray. ~1300 genes (shown in purple) were found to be differentially expressed ( $|\log_2FC| > 1$  & adjusted p-value < 0.05) and were used for pathway and GO enrichment.

Fig. S4:

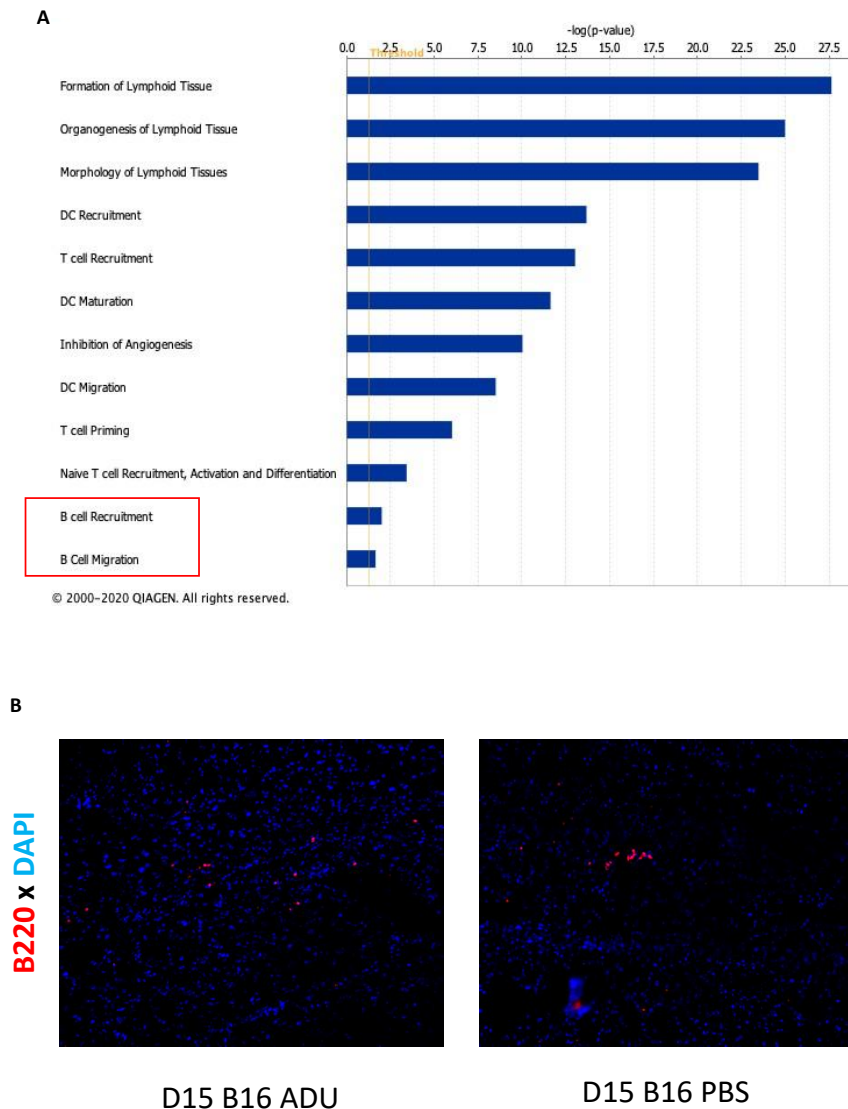

**Figure S4: STING activation does not improve B220+ B cell recruitment to s.c. B16.F10 melanomas. A.** Gene-set enrichment of STING activated CD11c<sup>+</sup> DC gene expression showing significant TLS nucleating, DC recruiting and T cell recruiting signatures, but poor B cell recruiting signatures. Threshold =  $-\log(p\text{-value})$  of 1.3 or p-value of 0.05. **B.** Representative immunofluorescence image showing no observable differences in B cell infiltration with ADU S-100 vs. PBS treatment of B16.F10 melanomas *in vivo*.

Fig. S5

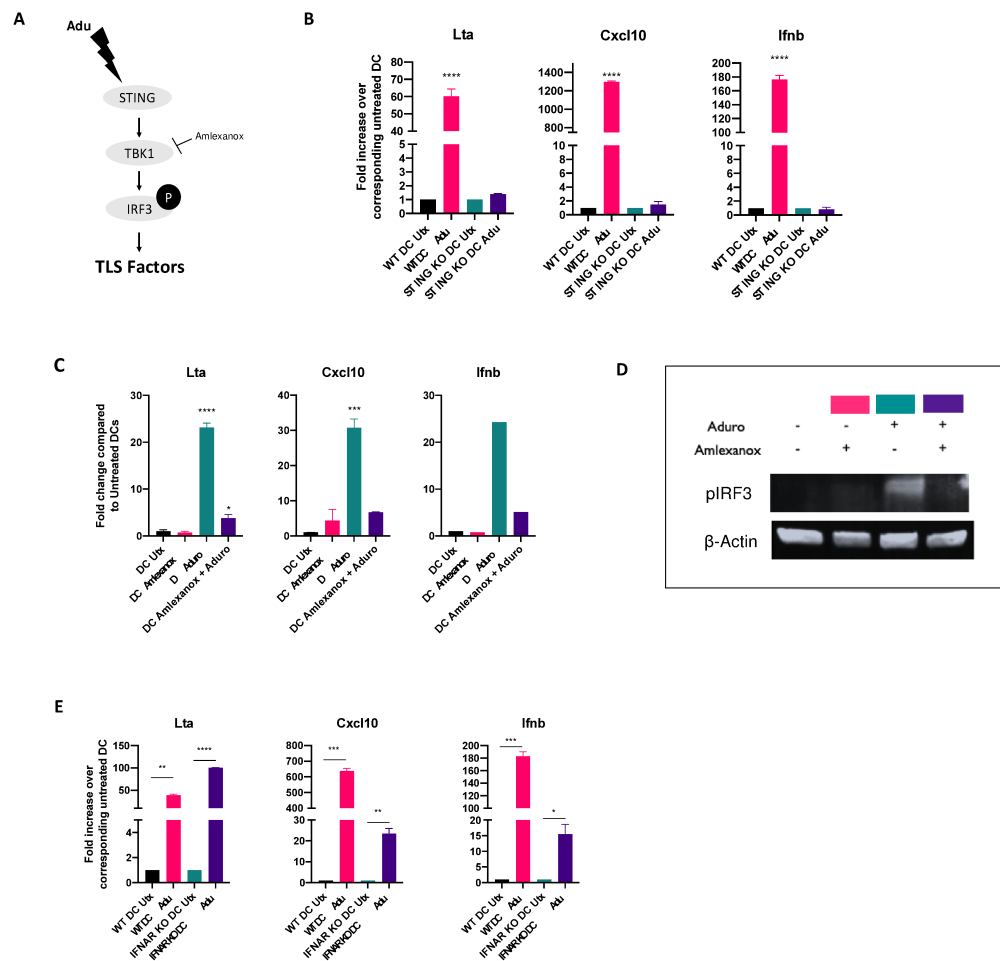

**Figure S5: STING activation is insufficient to promote production of TLS factors through a STING-TBK1-IRF3 signaling cascade.** **A.** Schematic representing canonical STING signaling cascade involving TBK1 and IRF3. **B.** STING activation significantly increases transcript levels of TLS factors in CD11c<sup>+</sup> DCs from WT hosts which is absent in DCs from STING KO hosts. \*\*\*\* $p < 0.0001$ , One-Way ANOVA. **C.** Inhibition of TBK1 using Amlexanox prior to STING activation ablates production of STING associated TLS factors. \* $p < 0.05$ , \*\*\* $p < 0.0002$ , \*\*\*\* $p < 0.0001$ , One-Way ANOVA. **D.** Immunoblotting confirms upregulation of TLS associated transcripts in CD11c<sup>+</sup> DCs (in panel C) occurs only with IRF3 activation/phosphorylation (S396). **E.** IFNAR KO DC retain ability to produce TLS factors upon STING activation. \* $p < 0.05$ , \*\* $p < 0.002$ , \*\*\* $p < 0.0002$ , \*\*\*\* $p < 0.0001$ , unpaired t-test.

Fig. S6:

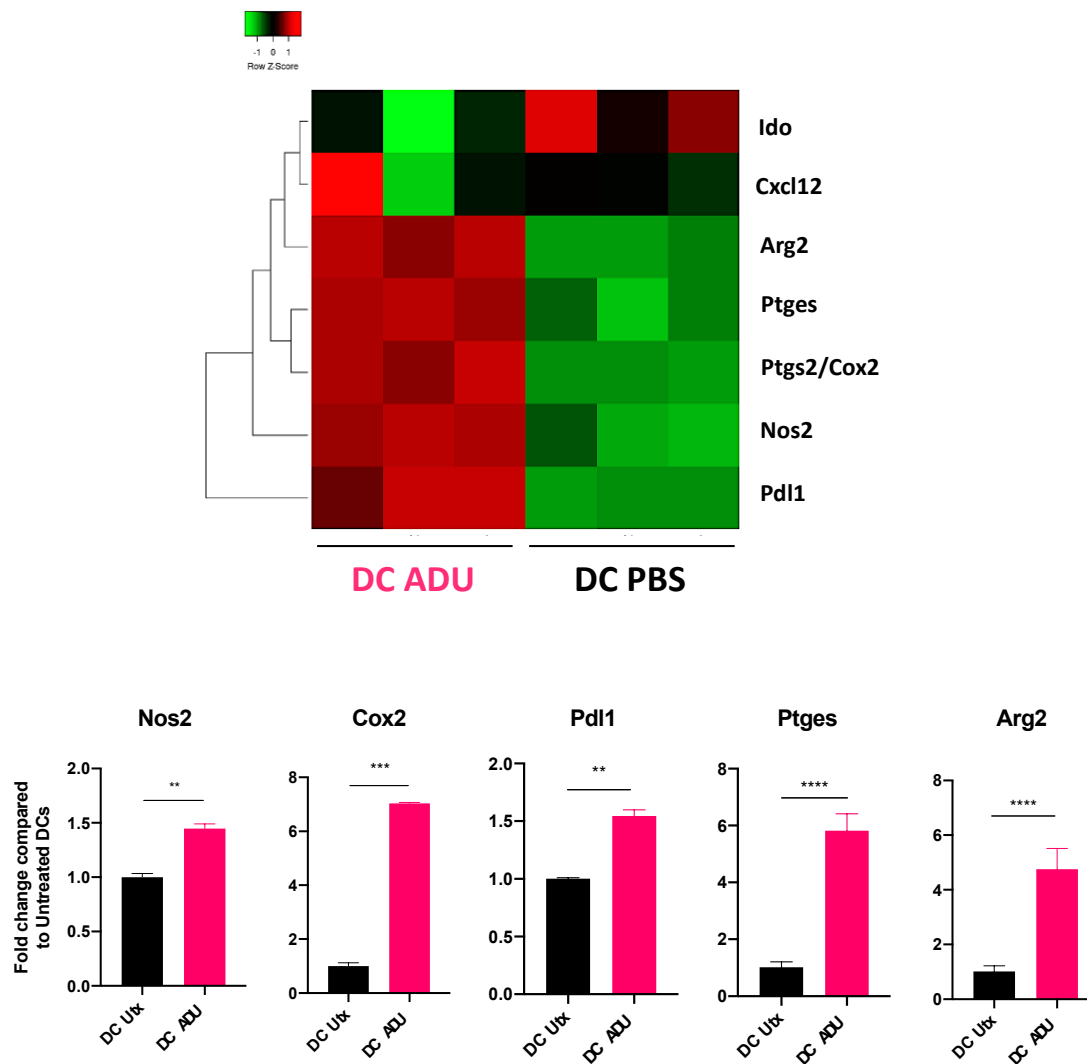

**Figure S6: STING mediated inflammation concomitantly upregulates expression of immune regulatory molecules by CD11c<sup>+</sup> DC.** A. Transcriptional profiling of isolated CD11c<sup>+</sup> DC treated with ADU S-100 vs. control media for immunoregulatory gene products including Arg2, Nos2, Pdl1, Ptges and Ptgs2/COX-2. Specific transcript levels determined by qRT-PCR as in Fig. 3. \*\*p < 0.002, \*\*\*p < 0.0002, \*\*\*\*p < 0.0001, unpaired t-test.

Fig. S7:

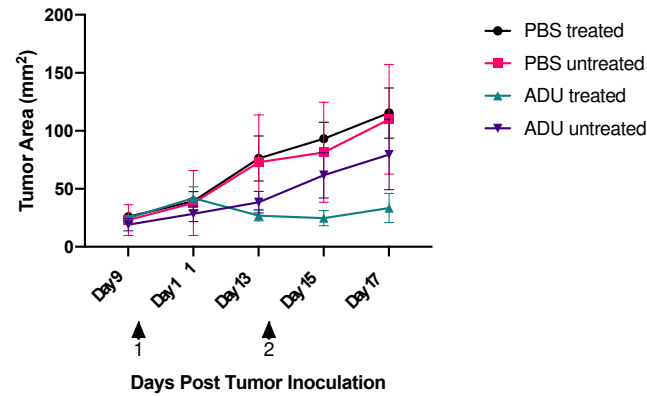

**Figure S7: Lack of prolonged systemic response with ADU S-100 in bilateral B16.F10 models.** B16.F10 tumor growth curves from pilot trials showing lack of extended therapy in un-injected left flank tumors of mice receiving 5  $\mu$ g ADU S-100 (i.t.) in right-flank tumors.



Table S1:

| Antigen                   | Clone      | Vendor         | Concentration     |
|---------------------------|------------|----------------|-------------------|
| CD3 Alexa Fluor 647       | 17A2       | BioLegend      | 1:50              |
| CD45 Alexa Fluor 488      | 30-F-11    | BioLegend      | 1:100             |
| CD11c Alexa Fluor 488     | N418       | BioLegend      | 1:100             |
| PNA <sup>d</sup> Purified | MECA 79    | BD Pharmingen  | 1:100             |
| CD31 Alexa Fluor 647      | MEC 13.3   | BioLegend      | 1:50              |
| B220 FITC                 | RA3-6B2    | Pharmingen     | 1:100             |
| Lyve-1 Purified           | ALY7       | Invitrogen     | 1:100             |
| PRGFR $\beta$ PE          | APB5       | Invitrogen     | 1:100             |
| VCAM1 Purified            | AF643      | R&D Systems    | 1:100             |
| Lectin Alexa Fluor 488    | DL-1174    | Vector Labs    | 200 $\mu$ g/mouse |
| CD133                     | N/A        | Santa Cruz Bio | 1:100             |
| Jarid1b                   | N/A        | Abcam          | 1:500             |
| pIRF3                     | CST 29047S | CST            | 1:1000            |
| $\beta$ -Actin            | ab6276     | Abcam          | 1:10000           |

**Supplemental Table 1:** List of antibodies and corresponding concentrations used for immunoblotting and immunofluorescence experiments

Table S2:

| Target     | Forward Primer       | Reverse Primer        |
|------------|----------------------|-----------------------|
| Ifnb       | TGGGAGATGTCCTCAACTGC | CCAGGCGTAGCTGTTGTACT  |
| Lta        | GCCCATCCACTCCCTCAGAA | TGCTGGGGTACCCAACAAGG  |
| Ltb        | GGACGTCGGGTTGAGAAGAT | ACGGTTTGTGTCATCCAGT   |
| Cxcl10     | ATGACGGGCCAGTGAGAATG | TCGTGGCAATGATCTCAACAC |
| Ptgs2/Cox2 | GGGCCCTTCTCCCGTAGA   | TGAGCCTTGGGGGTGAGGGA  |
| Nos2       | TCCTGGACATTACGACCCCT | CTCTGAGGGCTGACACAAGG  |
| Pdl1       | TCACTTGCTACGGGCGTTTA | ATCGTGACGTTGCTGCCATA  |
| Ccl19      | CCTGGGAACATCGTGAAAGC | TAGTGTGGTGAACACAACAGC |
| Ccl21      | GTGATGGAGGGGGTCAGGA  | GGGATGGGACAGCCTAAACT  |
| Cxcl13     | TCTCCAGGCCACGGTATTCT | GGGGCGTAACTTGAATCCGA  |
| Tnfsf15    | GACTGTATGCTTCGGGCCAT | ATTGTCAGGTGTGCTCTCGG  |
| Arg2       | ATCGGCTGATTGGCAAAAGG | AATCCCCCTACAACAGGGGT  |
| Ptges      | GCTGCGGAAGAAGGCTTTTG | GCTCCACATCTGGGTCCTC   |

**Supplemental Table 2:** List of gene targets and corresponding primer sequences used for quantitative real-time PCR analyses
